# Supplementary material for: MAPK CcSakA of the HOG Pathway Is Involved in Stipe Elongation during Fruiting Body Development in Coprinopsis cinerea
Source: MDPI journal article supplement (doi:10.3390/jof8050534), 2022-05-20
Supplement: s1 [file s1]

Table S1. Oligonucleotides used in this study

| Name                                                            | Sequence (5'-3')                                                          | T <sub>m</sub> (°C) |
|-----------------------------------------------------------------|---------------------------------------------------------------------------|---------------------|
| Primers used for construction of plasmids                       |                                                                           |                     |
| SakAi-AS-F                                                      | TACACACAACAAGCTCATCGCCATGGGATACGAGC<br>CAATCCGAAATCG                      | 63.5                |
| SakAi-AS-R                                                      | GTTTCGTTGGCAATACTCCACCCATGGCGAGTACAAT<br>GTCCTTCGTCAAAC                   | 60.8                |
| SakAi-S-F                                                       | GGTGCACGGGAATATTTTCGCGGTACCCGAGTACAA<br>TGTCCTTCGTCAAAC                   | 60.8                |
| SakAi-S-R                                                       | GATCCCGGTTCGGCATCTACTGGTACCGATACGAGCC<br>AATCCGAAATCG                     | 63.5                |
| SakAm-1-F                                                       | TACACACAACAAGCTCATCGCCATGTCCTTCGTCAA<br>ACTCAGCAT                         | 60.5                |
| SakAm-1-F                                                       | AGACATCGCCCTCCATTTGCGGATCCTGGATACG                                        | 82.9                |
| SakAm-2-F                                                       | AATGGAGGGCGATGTCTCGACACGATACTACCGGG                                       | 82.2                |
| SakAm-2-R                                                       | CGGTCGGCATCTACTGGTACCTCACTTATCGTCGTC<br>ATCCTTGTAATCAGCATGGCCATTTCGAGTAGC | 85.6                |
| Primers used for Vector verification of different transformants |                                                                           |                     |
| pCC-SakAi1-F                                                    | CGAAGAAGAATTAAGAGGTCCGCAA                                                 | 65.4                |
| pCC-SakAi1-R                                                    | TACTTTGTCACAGAGCTCCTCGGAA                                                 | 64.5                |
| pCC-SakAi2-F                                                    | ACTTTGTCACAGAGCTCCTCGGAAC                                                 | 65.2                |
| pCC-SakAi2-R                                                    | CGTACTAGGGTTGCGAGGTCCA                                                    | 64                  |
| pCC-SakAm1-F                                                    | TGTTCTCGGTGTTTtaggggTTAGCA                                                | 66.2                |
| pCC-SakAm1-R                                                    | CGAGGACCGGTGTGCTGAAAG                                                     | 65.1                |
| pCC-SakAm2-F                                                    | AAGCGGAAGAGAAATTTGATTGGAG                                                 | 64.6                |
| pCC-SakAm2-R                                                    | TCTGGAAGAGGTAAACCCGAAACG                                                  | 65.8                |
| pCC-ck1-F                                                       | GGGCTGGCTTAACCTATGCGGCATC                                                 | 69.9                |
| pCC-ck1-R                                                       | AGATGGTGGATGTGACCGGAATTGG                                                 | 69.9                |
| pCC-ck2-F                                                       | CGAGACTGAGGAATCCGCTCTTGGC                                                 | 71.3                |
| pCC-ck2-R                                                       | TCCGGCTCGTATGTTGTGTGGAATTG                                                | 70.8                |
| pab1-ck1-F                                                      | CAGGAAACAGCTATGACCATGATTACGC                                              | 68.4                |
| pab1-ck1-R                                                      | GCGTGAATGAGTCGTACGAATCGAC                                                 | 67                  |
| pab1-ck2-F                                                      | GGTGAGGAAGTTGAGGTCGGTATGG                                                 | 67.1                |
| pab1-ck2-R                                                      | GTAAAACGACGGCCAGTGAATTGTAATAC                                             | 66.9                |
| Primers used in qRT-PCR                                         |                                                                           |                     |
| Q-β-tubulin-F                                                   | GGAGAGACCTTTTGGGAGATGC                                                    | 61.8                |
| Q-β-tubulin-R                                                   | CATGGTCGACTTGGTCGAAATATAC                                                 | 62.1                |
| Q-SakA-F                                                        | GCTCCTCGGAACTGACCTTCAC                                                    | 62.6                |

|            |                      |      |
|------------|----------------------|------|
| Q-SakA-R   | CGACACCCGCTGAATGAACG | 64.4 |
| Q-ChiE1-F  | TACGGCTTGGACGGTCTGGA | 63.5 |
| Q-ChiE1-R  | TCCTTCGCCGTTCTCCCTCT | 63.4 |
| Q-ChiIII-F | GCCAACCACCAGAAGCGACT | 62.3 |
| Q-ChiIII-R | TGGCGAGGTTGATGGATGGT | 63.1 |
| Q-Chis1-F  | AGTTCGCTGGTGGCTTCTAC | 57   |
| Q-Chis1-R  | GCCTCCTCCACTCTCTCTCA | 56.3 |
| Q-Chis2-F  | CAGGCGGCTTTAGGGACAAT | 61.7 |
| Q-Chis2-R  | CGGGTACATCAAGGACGAGG | 60.1 |

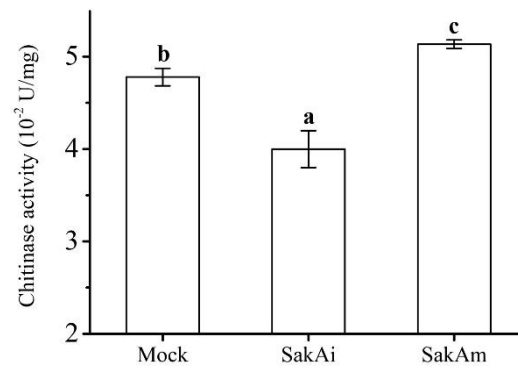

Figure S1. The chitinase activity of CcSakA gene silencing (SakAi) transformants, CcSakA phosphomimicking mutant (SakAm) transformants and mock transformants (n=9). The different letters (a, b and c) indicate significant differences ( $P < 0.05$ ) by Duncan's test.
